# Supplementary material for: Manipulating the spin state to activate the atomically dispersed Fe–N–C catalyst for oxygen reduction
Source: Royal Society of Chemistry journal article supplement (doi:10.1039/d3ey00066d), 2023-01-01
Supplement: d3ey00066d1.pdf [file d3ey00066d1.pdf]

## **Electronic Supplementary Information (ESI)**

### **Manipulating spin state to activate atomically dispersed Fe-N-C catalyst for oxygen reduction**

Fan Liu,<sup>a</sup> Chengxiang Shi,<sup>a</sup> Lun Pan,<sup>a</sup> Zhen-Feng Huang,<sup>\*a</sup> Xiangwen Zhang,<sup>a</sup> and Ji-Jun Zou<sup>\*a,b</sup>

<sup>a</sup>Key Laboratory for Green Chemical Technology of the Ministry of Education, School of Chemical Engineering and Technology, Tianjin University, Tianjin 300072, China; Collaborative Innovative Center of Chemical Science and Engineering (Tianjin), Tianjin 300072, China; Zhejiang Institute of Tianjin University, Ningbo, Zhejiang, 315201, China.

<sup>b</sup>Qinghai Quality Certification Consulting and Inspection Center Co., Ltd., Qinghai, China.

E-mail: jj\_zou@tju.edu.cn (J.-J. Zou) and zfhuang@tju.edu.cn (Z.-F. Huang).

## 1. Methods

### 1.1 Materials

FeCl<sub>2</sub>·4H<sub>2</sub>O (99%), 1,3,5-Benzenetricarboxylic acid (99%), melamine (99%), Nafion solution (~5 wt.%) were obtained from Sigma-Aldrich. Absolute ethanol and isopropanol were obtained from the Chemicals Testing and Calibration Laboratory. All chemicals were used as received. High-purity water (18.25 MΩ·cm) supplied by a Milli-Q Gradient A10 system was used in all of the experiments.

### 1.2 Electrochemical measurements

The number of electron transfer (n) during the reaction was mainly calculated by the Koutecky-Levich (K-L) equation:

$$J^{-1} = J_L^{-1} + J_K^{-1} = B^{-1} \omega^{-1/2} + J_K^{-1} \quad (1)$$

$$B = 0.2nFC_0(D_0)^{2/3} \nu^{-1/6} \quad (2)$$

Where J and JK represent measured current density and diffusion-limited current density, respectively, n is the number of electron transfer during the ORR, F is Faraday constant (96485 C mol<sup>-1</sup>), C<sub>0</sub> is the O<sub>2</sub> concentration in the electrolyte (C<sub>0</sub> = 1.2 × 10<sup>-3</sup> mol L<sup>-1</sup>), D<sub>0</sub> is the O<sub>2</sub> diffusion coefficient (D = 1.9 × 10<sup>-5</sup>), ν is the kinetic viscosity of the electrolyte (0.01 cm<sup>2</sup> s<sup>-1</sup> for 0.1 M KOH) and ω indicates the electrode rotation rate.

The number of electron transfer (n) and the yield of H<sub>2</sub>O<sub>2</sub> were calculated by the following two equations:

$$n = 4I_d (I_d + I_r N^{-1})^{-1} \quad (3)$$

$$H_2O_2\% = 200I_r (N I_d + I_r)^{-1} \quad (4)$$

Where I<sub>d</sub> is the disk current, I<sub>r</sub> is the ring current, and N (0.37) is the collection coefficient.

The durability tests were conducted by measuring the current vs. time (i-t) chronoamperometric response at potential 0.6 V for 80000s in O<sub>2</sub>-saturated electrolyte. The tolerance to CH<sub>3</sub>OH test was performed in chronoamperometric at 0.6 V in O<sub>2</sub>-saturated 0.1 M KOH solution along with the injection of CH<sub>3</sub>OH (3 M) at 1500s. All measured potentials in this work were converted with reference to the standard RHE, according to the Nernst equation of E<sub>RHE</sub> = E<sub>Ag/AgCl</sub> + 0.21 + 0.059 × pH.

The turnover frequency (TOF) is estimated by the following Equation:

$$TOF = JS (4nF)^{-1} \quad (5)$$

Where, J (mA cm<sup>-2</sup>) and S (0.196 cm<sup>2</sup>) represent the kinetic current density at 0.85 V and the surface area of glassy carbon disk, respectively, the number 4 means that 4 electrons are involved in reacting with per mole of O<sub>2</sub>, F denotes Faraday's constant (96485.3 C mol<sup>-1</sup>), while n is the molecular weight of the corresponding atom calculated from the catalyst loading m.

The electrochemically active surface area (ECSA) was evaluated based on double layer capacitance (C<sub>dl</sub>) in the non-Faradaic potential region. Specifically, the was tested via CV measurements at various scan rates (10, 20, 30, 40, 60, 80, and 100 mV s<sup>-1</sup>). The C<sub>dl</sub> was obtained by plotting (j<sub>a</sub>-j<sub>c</sub>) at 1.10 V vs. RHE (where j<sub>a</sub> and j<sub>c</sub> are the anodic and cathodic current densities, respectively) against the scan rates. The slope of the above profiles was twice of C<sub>dl</sub>. The ECSA was calculated using the following equation:

$$ECSA = C_{dl} C_s^{-1} \quad (6)$$

Where C<sub>s</sub> is the specific capacitance of a smooth surface of materials under specific electrochemical condition. According to previous study, the value of was 0.04 m F cm<sup>-2</sup> in this calculation.

Mass activity of the catalyst was estimated using the following equation:

$$I_{\text{mass}} = I_{\text{kin}} / M_{\text{catalyst}} \quad (7)$$

Specific activity expressed as the activity per real surface area, can be calculated as

$$I_{\text{spec}} = I_{\text{kin}} / A_{\text{real}} \quad (8)$$

In this equation,  $M_{\text{catalyst}}$  denotes the absolute Fe loading ( $\mu\text{g}_{\text{Fe}}$ ),  $A_{\text{real}}$  denotes the absolute electrochemically active surface area ( $\text{m}^2$ ) and  $I_{\text{kin}}$  denotes the kinetic current (mA), which was calculated using:  $I_{\text{kin}} = I_{0.8} \times I_{\text{lim}} / (I_{\text{lim}} - I_{0.8})$ .  $I_{0.8}$  and  $I_{\text{lim}}$  denote the geometric current at 0.8 V vs. RHE and the diffusion limited current, respectively.

The performance of Zn-air battery was measured in home-made electrochemical cells. The zinc-air battery was composed of a polished zinc foil as anode,  $1 \times 1 \text{ cm}^2$  carbon paper loaded with catalysts as cathode and 6.0 M KOH with 0.2 M zinc acetate mixture aqueous solution served as the electrolyte. The catalyst loading of the 20 wt.% Pt/C or  $\text{Fe}_{\text{SAC}}\text{-NC}$  was  $1 \text{ mg cm}^{-2}$ .

### 1.3 DFT calculations

The ORR catalyze on  $\text{FeN}_4$  and  $\text{Fe}_{\text{SAC}}\text{-NC}$  systems were calculated based on four-electron pathway.

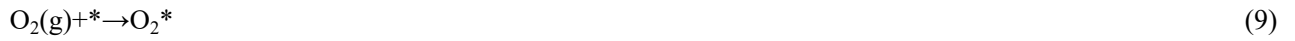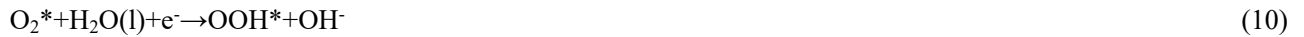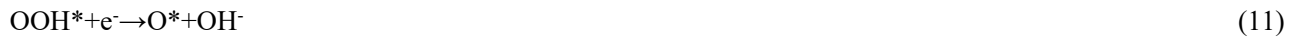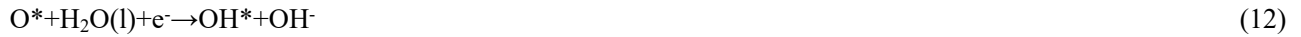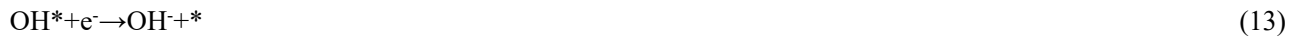

In this case, \* represents the active sites.

The adsorption energy of the  $^*\text{OOH}$ ,  $^*\text{O}$ , and  $^*\text{OH}$  intermediates was defined as the difference in energy between the adsorbed complex and the sum of the isolated  $\text{Fe}_{\text{SAC}}\text{-NC}$  catalyst and the isolated  $^*\text{OOH}$ ,  $^*\text{O}$ , and  $^*\text{OH}$  group.

The free energy ( $\Delta G$ ) is obtained by<sup>1</sup>

$$\Delta G = \Delta E + \Delta \text{ZPE} - T\Delta S + \Delta G_{\text{U}} + \Delta G_{\text{pH}} \quad (14)$$

where  $\Delta E$  is the energy difference between the reactants and the products, which can be obtained directly by DFT calculation.  $\Delta \text{ZPE}$  and  $\Delta S$  are the contributions to the free energy from the zero-point vibration energy and entropy, respectively.  $T$  is the temperature (298.15 K).  $\Delta G_{\text{U}} = -eU$ , here  $U$  is the potential applied to the electrode.  $\Delta G_{\text{pH}}$  is the correction of the  $\text{H}^+$  free energy.

The definition of the magnetic moment ( $M$ ) is

$$M = N(\text{spin-up}) - N(\text{spin-down}) \quad (15)$$

$$M = M(3dxy) + M(3dx^2-y^2) + M(3dz^2) + M(3dxz) + M(3dyz) \quad (16)$$

Here,  $N(\text{spin-up})$  and  $N(\text{spin-down})$  denote the number of electrons in the spin-up and spin-down occupied states, respectively.<sup>2,3</sup>  $M(3dxy)$ ,  $M(3dx^2-y^2)$ ,  $M(3dz^2)$ ,  $M(3dxz)$ , and  $M(3dyz)$  indicate the projected of magnetic moments on Fe  $3dxy$ ,  $3dx^2-y^2$ ,  $3dz^2$ ,  $3dxz$ , and  $3dyz$ , respectively.

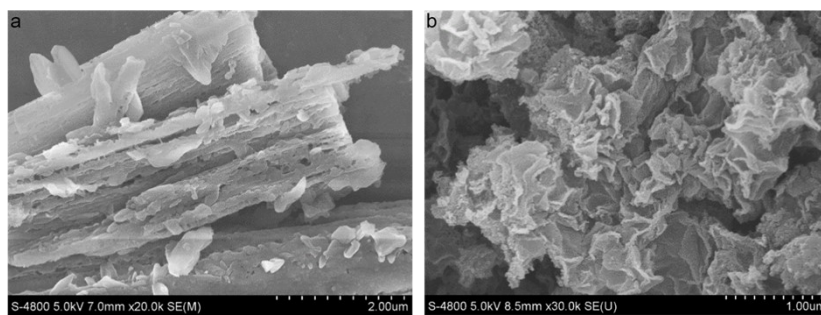

**Figure S1.** (a) SEM images of NC. (b) SEM images of Fe<sub>SAC</sub>-NC.

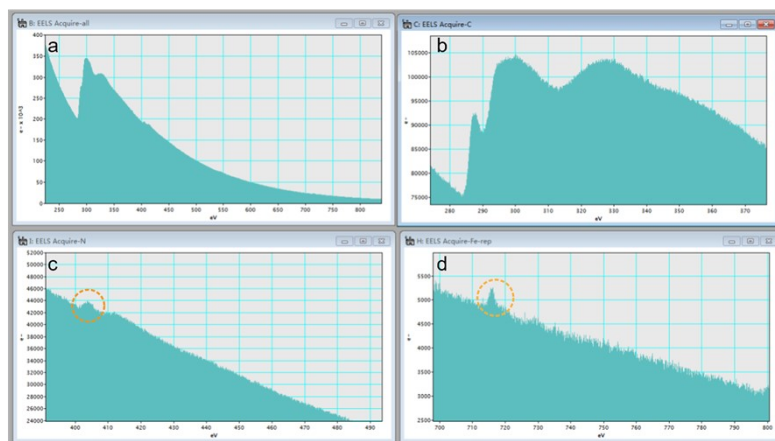

**Figure S2.** EELS point spectrum of Fe<sub>SAC</sub>-NC. (a) full spectrum. (b) C spectrum. (c) N spectrum. (d) Fe spectrum.

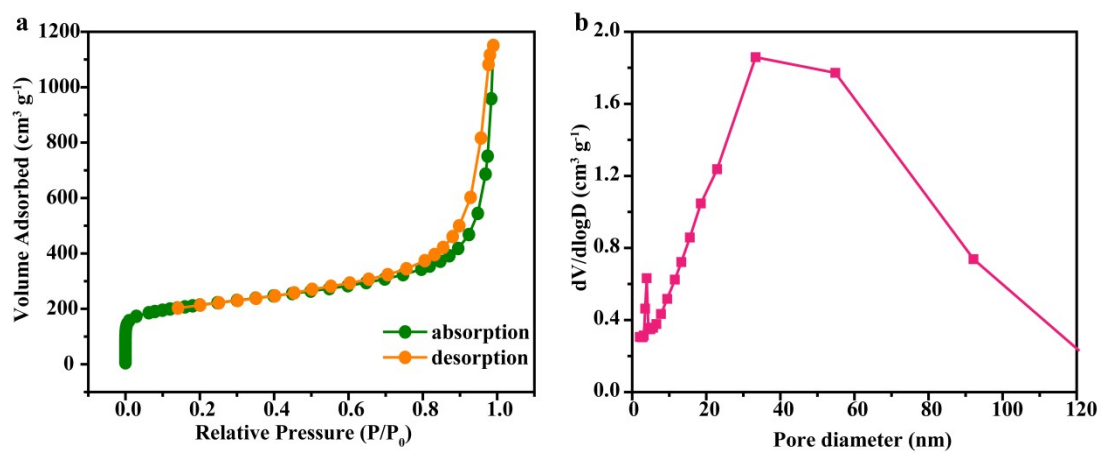

**Figure S3.** (a) N<sub>2</sub> adsorption-desorption curves of Fe<sub>SAC</sub>-NC. (b) Pore distribution curve of Fe<sub>SAC</sub>-NC.

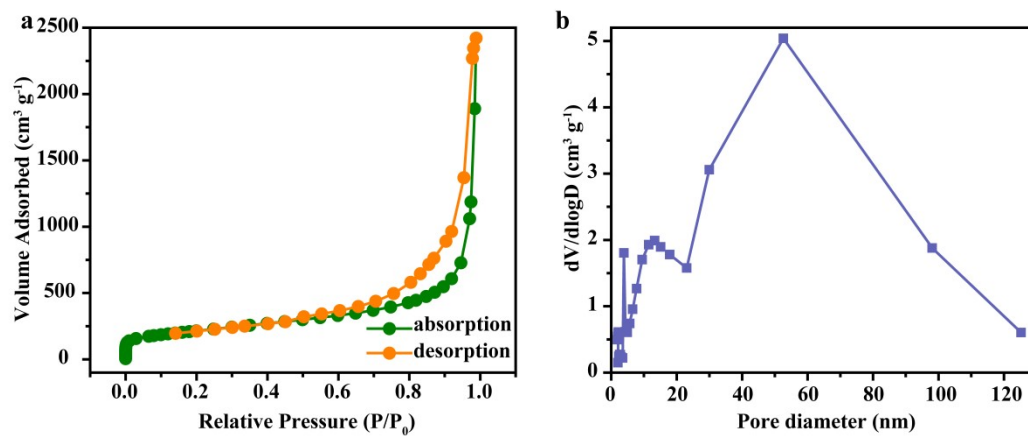

**Figure S4.** (a) N<sub>2</sub> adsorption-desorption curves of FeN<sub>4</sub>. (b) Pore distribution curve of FeN<sub>4</sub>.

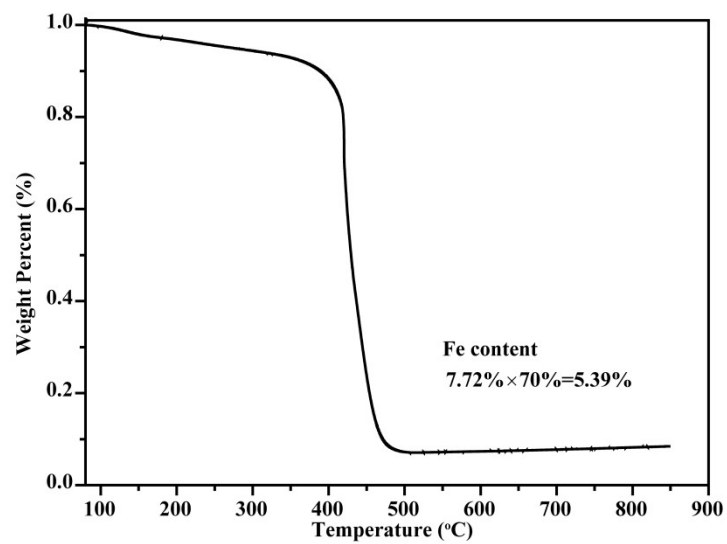

**Figure S5.** TGA curve of Fe<sub>SAC</sub>-NC tested in air ambient.



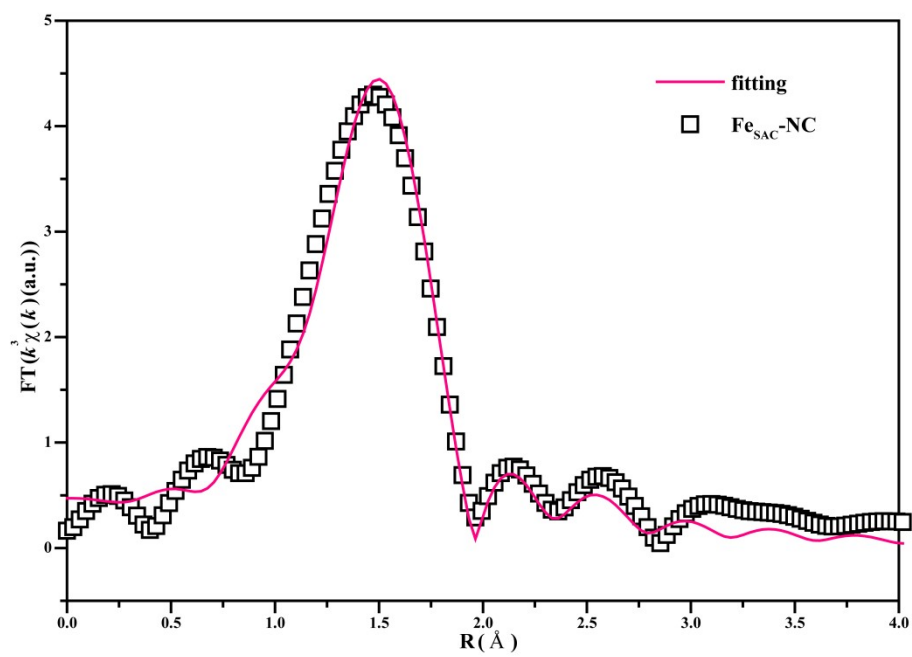

**Figure S6.**  $k^3$ -weighted Fourier transform spectra of  $Fe_{SAC-NC}$  and corresponding fitting curve.

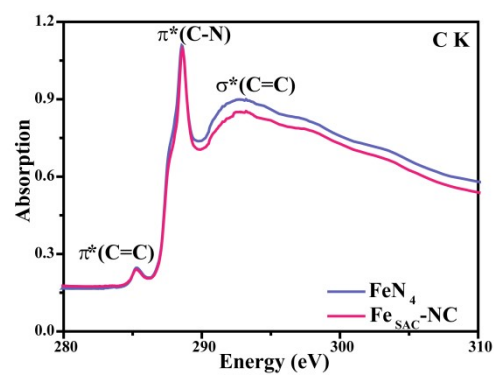

**Figure S7.** The normalized XANES spectra at the C K-edge of FeN<sub>4</sub> and Fe<sub>SAC</sub>-NC.

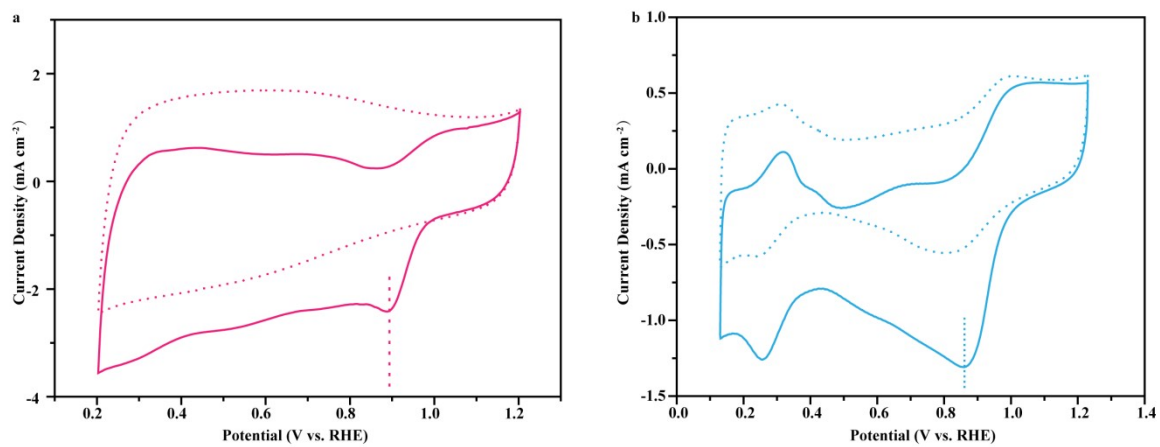

**Figure S8.** (a) The CV curves of Fe<sub>SAC</sub>-NC in O<sub>2</sub> (solid) or Ar (dotted)-saturated 0.1M KOH. (b) The CV curves of 20% Pt/C in O<sub>2</sub> (solid) or Ar(dotted)-saturated 0.1M KOH.

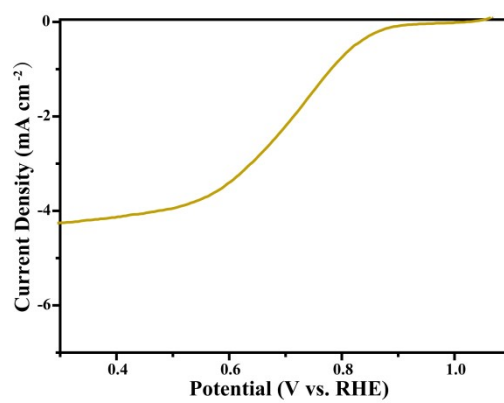

**Figure S9.** LSV curve of NC.

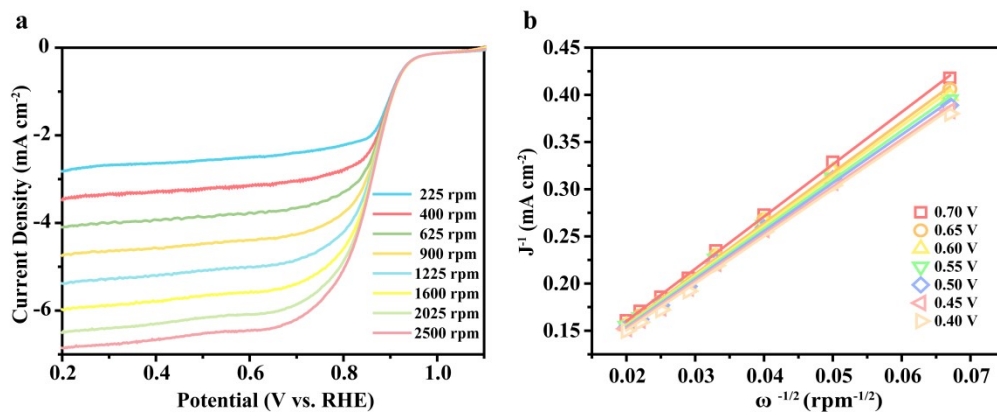

**Figure S10.** (a) LSVs curves of Fe<sub>SAC</sub>-NC measured at different RDE rotating speed in O<sub>2</sub>-saturated electrolytes. (b) The corresponding K-L plot of Fe<sub>SAC</sub>-NC.

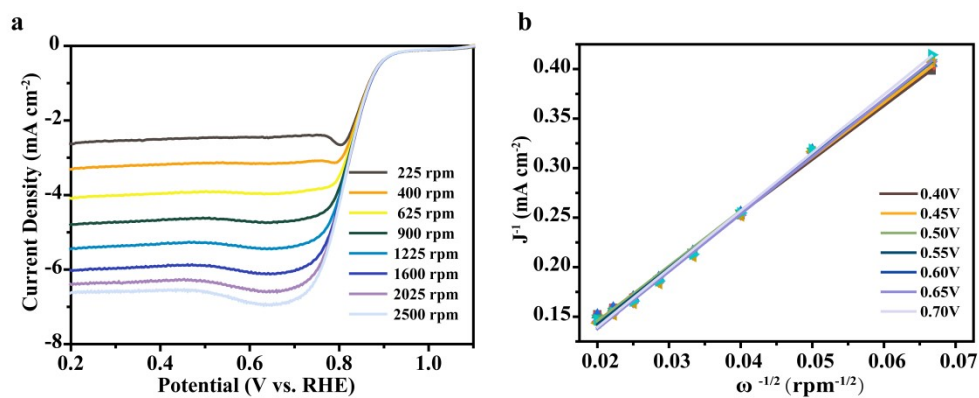

**Figure S11.** (a) LSVs curves of FeN<sub>4</sub> measured at different RDE rotating speed in O<sub>2</sub>-saturated electrolytes. (b) The corresponding K-L plot of FeN<sub>4</sub>.

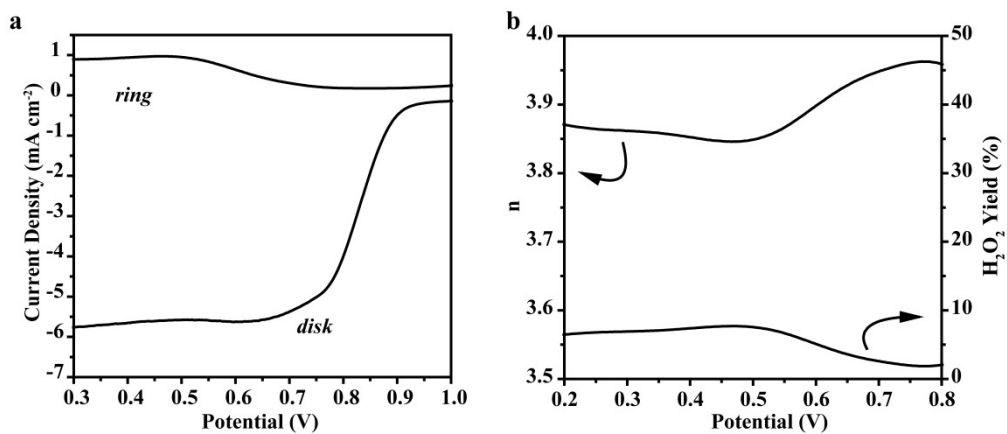

**Figure S12.** (a) RRDE test of FeN<sub>4</sub>. (b) Electron transfer number (n) and H<sub>2</sub>O<sub>2</sub> yield calculated from RRDE measurement of FeN<sub>4</sub>.

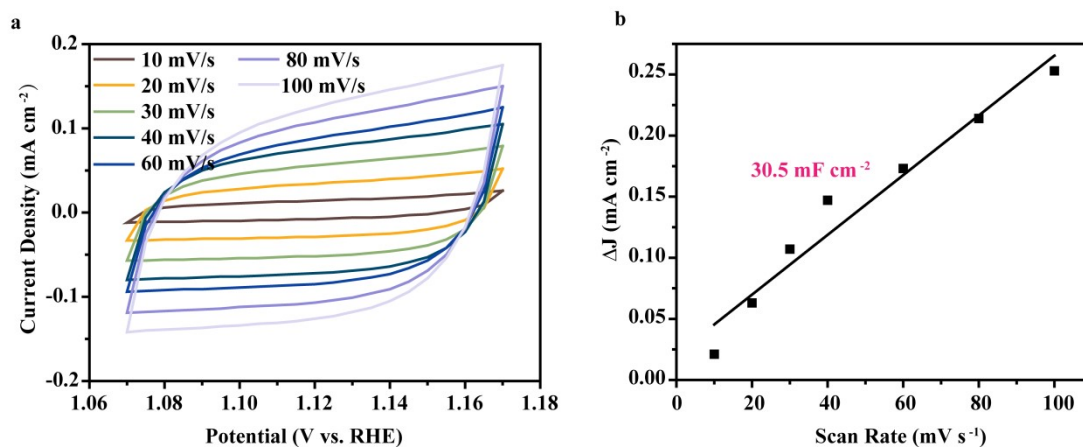

**Figure S13.** (a) CV curves for Fe<sub>SAC</sub>-NC in the region of 1.06-1.18 V vs. RHE with various scan rates. (b) Scan-rate dependency of the current density for Fe<sub>SAC</sub>-NC.



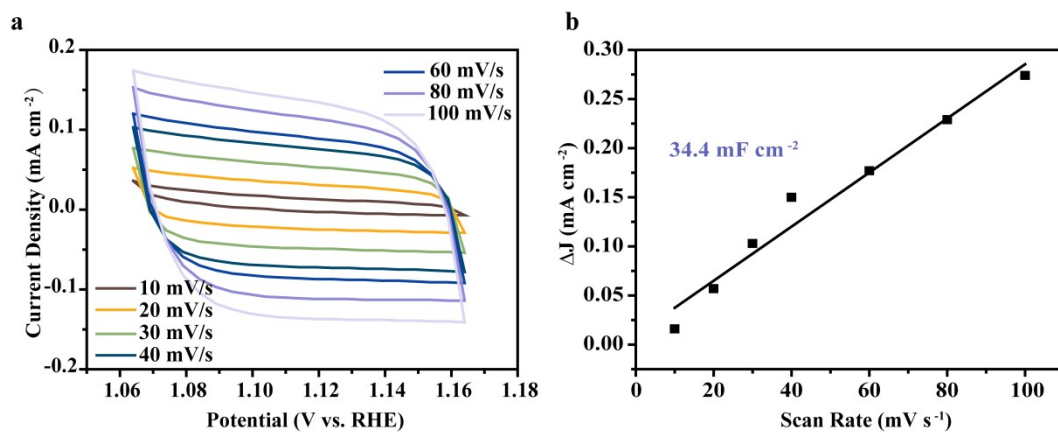

**Figure S14.** (a) CV curves for FeN<sub>4</sub> in the region of 1.06-1.18 V vs. RHE with various scan rates. (b) Scan-rate dependency of the current density for FeN<sub>4</sub>.

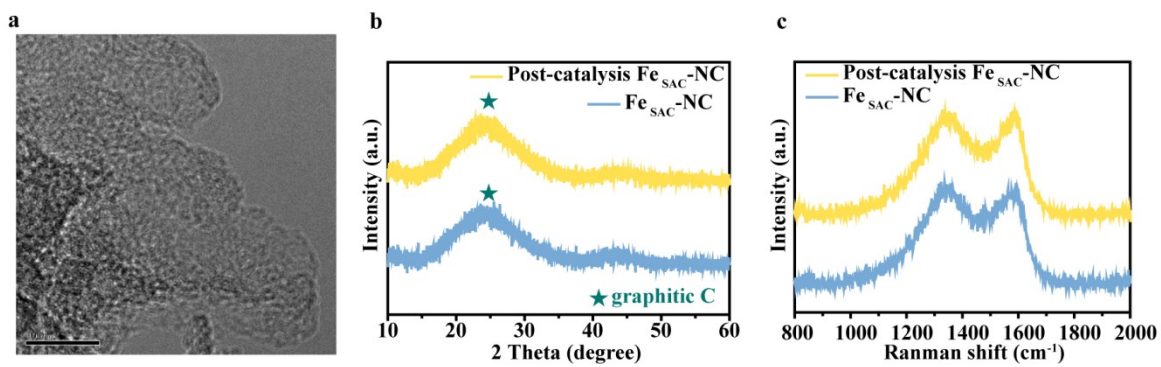

**Figure S15.** (a) HRTEM image of Fe<sub>SAC</sub>-NC after ORR measurement. (b) XRD patterns of Fe<sub>SAC</sub>-NC before and after ORR measurement. (c) Raman spectra of Fe<sub>SAC</sub>-NC before and after ORR measurement.

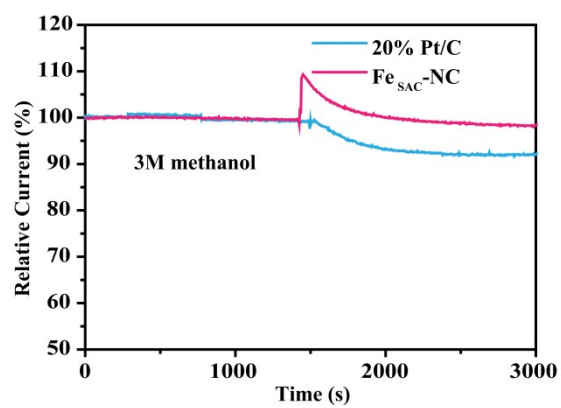

**Figure S16.** Methanol crossover effect test of Fe<sub>SAC</sub>-NC and 20% Pt/C.

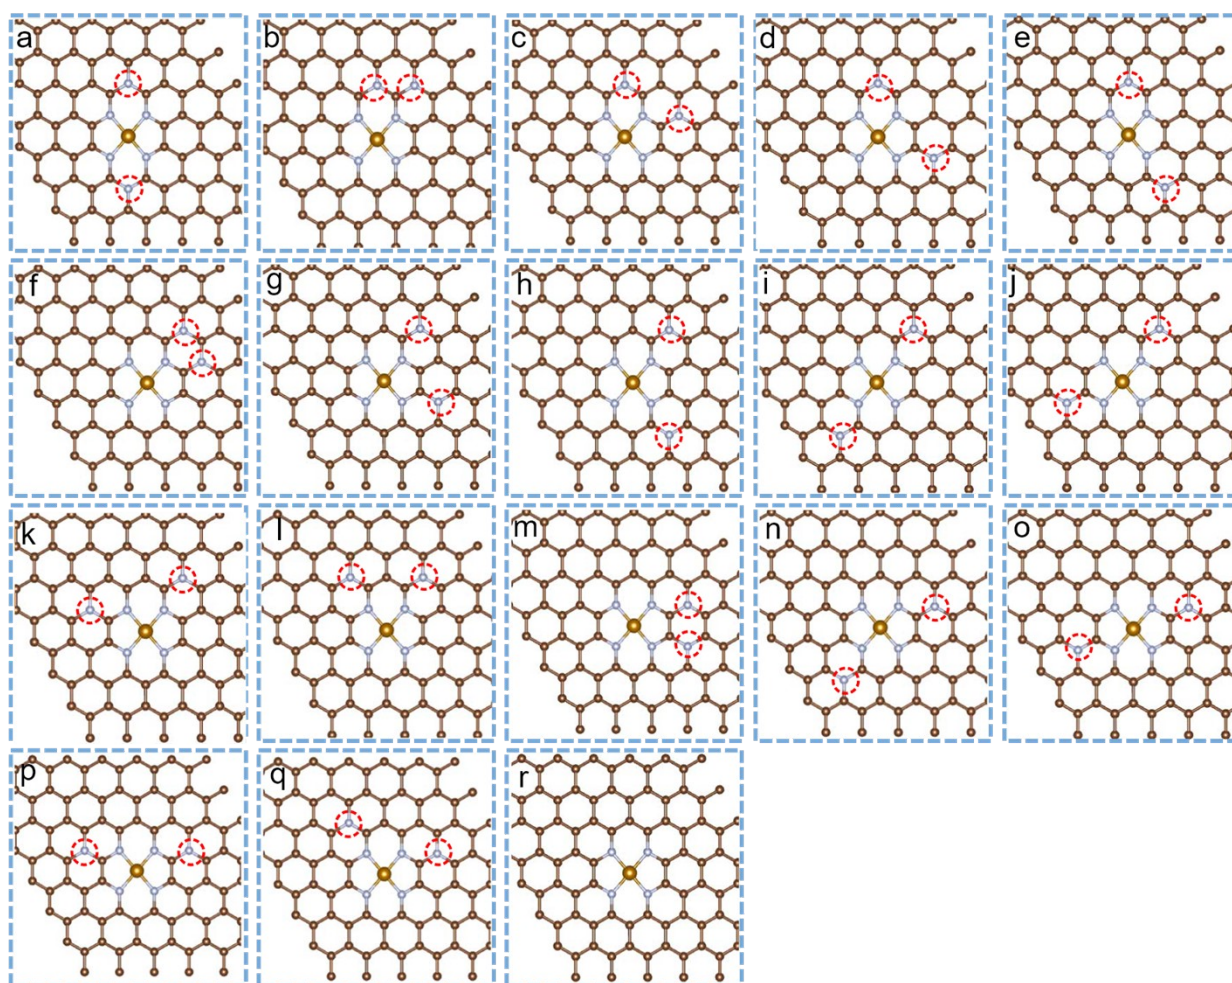

**Figure S17.** Optimized structure of (a)  $\text{Fe}_{\text{SAC}}\text{-N}_1\text{C}$ . (b)  $\text{Fe}_{\text{SAC}}\text{-N}_2\text{C}$ . (c)  $\text{Fe}_{\text{SAC}}\text{-N}_3\text{C}$ . (d)  $\text{Fe}_{\text{SAC}}\text{-N}_4\text{C}$ . (e)  $\text{Fe}_{\text{SAC}}\text{-N}_5\text{C}$ . (f)  $\text{Fe}_{\text{SAC}}\text{-N}_6\text{C}$ . (g)  $\text{Fe}_{\text{SAC}}\text{-N}_7\text{C}$ . (h)  $\text{Fe}_{\text{SAC}}\text{-N}_8\text{C}$ . (i)  $\text{Fe}_{\text{SAC}}\text{-N}_9\text{C}$ . (j)  $\text{Fe}_{\text{SAC}}\text{-N}_{10}\text{C}$ . (k)  $\text{Fe}_{\text{SAC}}\text{-N}_{11}\text{C}$ . (l)  $\text{Fe}_{\text{SAC}}\text{-N}_{12}\text{C}$ . (m)  $\text{Fe}_{\text{SAC}}\text{-N}_{13}\text{C}$ . (n)  $\text{Fe}_{\text{SAC}}\text{-N}_{14}\text{C}$ . (o)  $\text{Fe}_{\text{SAC}}\text{-N}_{15}\text{C}$ . (p)  $\text{Fe}_{\text{SAC}}\text{-N}_{16}\text{C}$ . (q)  $\text{Fe}_{\text{SAC}}\text{-N}_{17}\text{C}$ . (r)  $\text{FeN}_4$ . (The names are derived from the N atoms respective locations.)

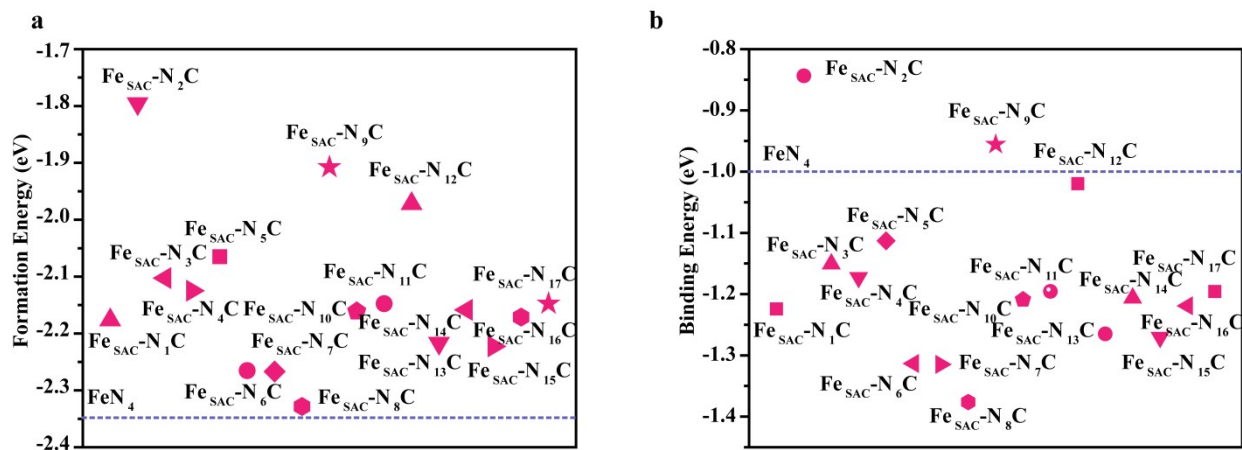

**Figure S18.** (a) The formation energy of Fe<sub>SAC</sub>-N<sub>X</sub>C (X=1-17). (b) The binding energy of Fe site on Fe<sub>SAC</sub>-N<sub>X</sub>C (X=1-17).

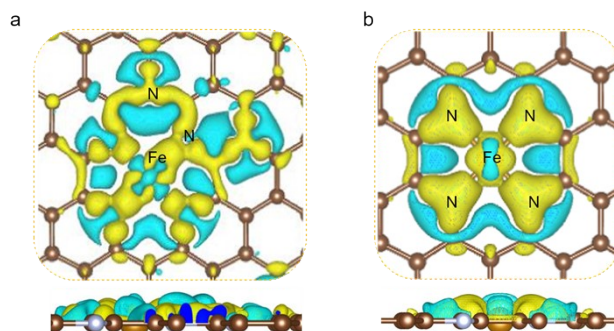

**Figure S19.** (a) Differential charge density of Fe<sub>SAC</sub>-N<sub>3</sub>C. (b) Differential charge density of FeN<sub>4</sub>. Yellow regions indicate charge accumulation, while cyan regions indicate charge depletion. As for FeN<sub>4</sub>, the electrons are transferred from Fe to N, resulting in a distinct depletion of charge density on the Fe site, which is consistent with the results of XAS and XPS.

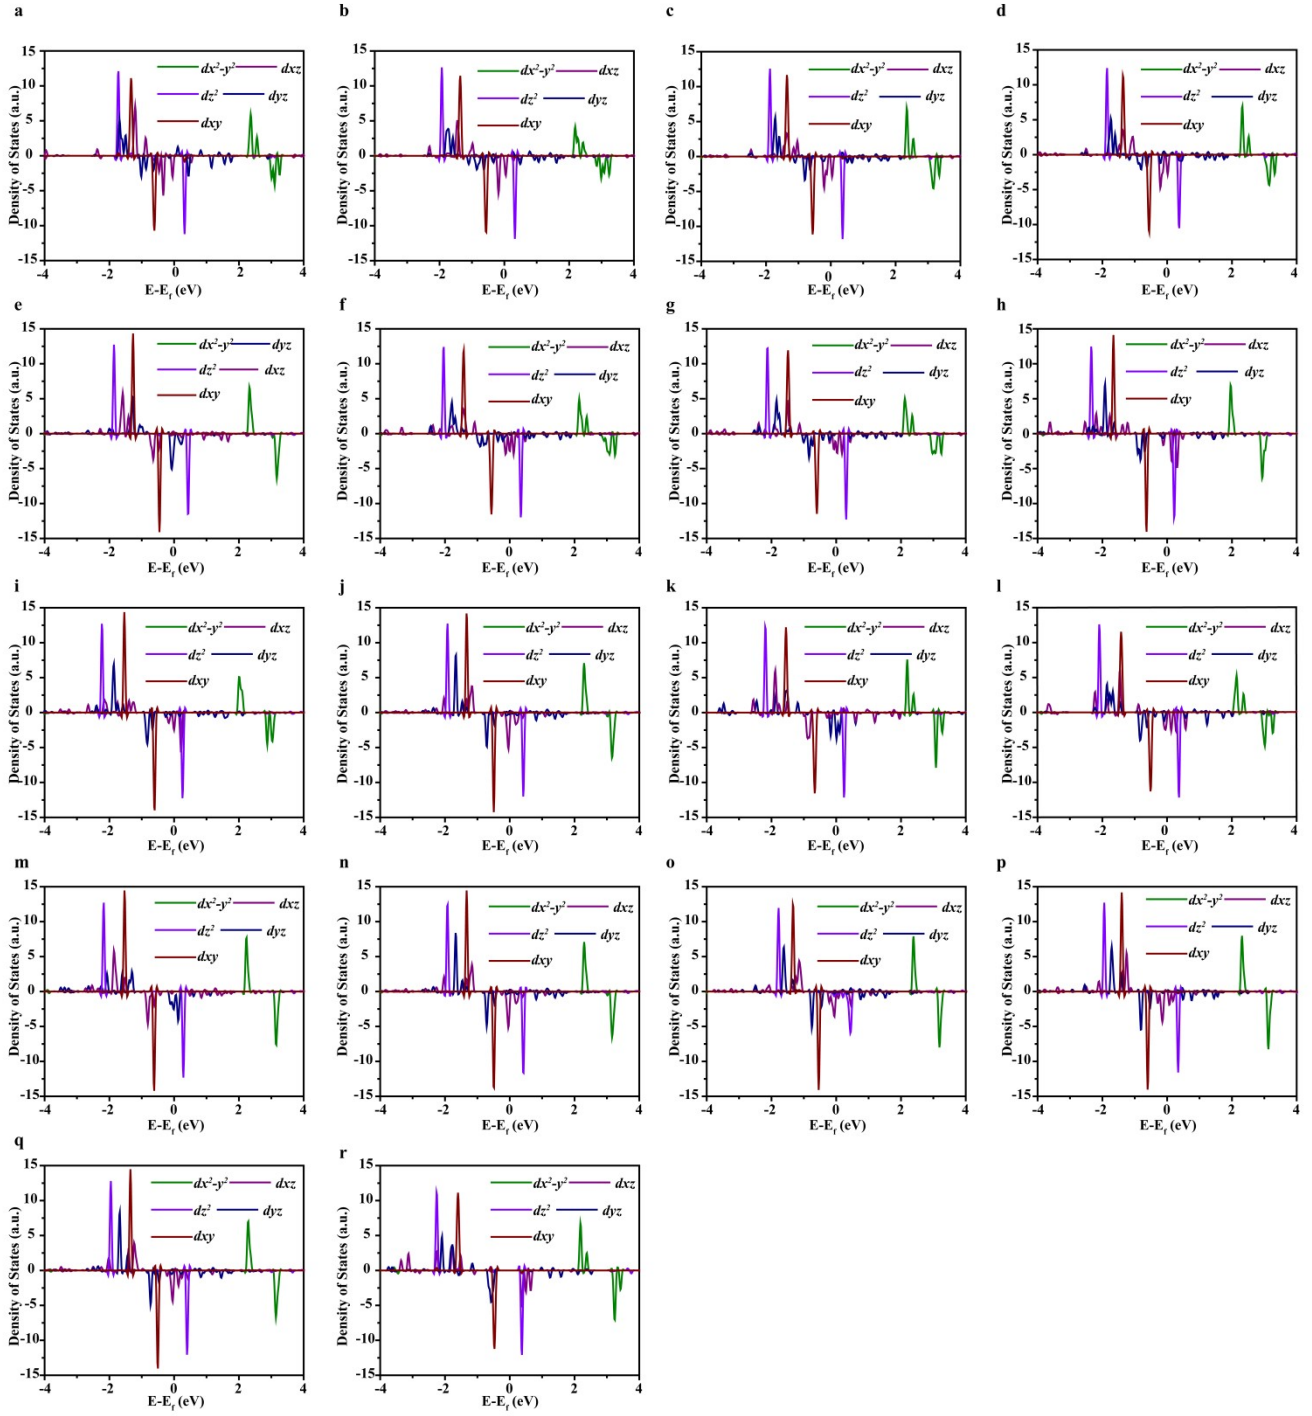

**Figure S20.** Detailed DOS of Fe d orbitals: (a)  $\text{FeSAC-N}_1\text{C}$ , (b)  $\text{FeSAC-N}_2\text{C}$ , (c)  $\text{FeSAC-N}_3\text{C}$ , (d)  $\text{FeSAC-N}_4\text{C}$ , (e)  $\text{FeSAC-N}_5\text{C}$ , (f)  $\text{FeSAC-N}_6\text{C}$ , (g)  $\text{FeSAC-N}_7\text{C}$ , (h)  $\text{FeSAC-N}_8\text{C}$ , (i)  $\text{FeSAC-N}_9\text{C}$ , (j)  $\text{FeSAC-N}_{10}\text{C}$ , (k)  $\text{FeSAC-N}_{11}\text{C}$ , (l)  $\text{FeSAC-N}_{12}\text{C}$ , (m)  $\text{FeSAC-N}_{13}\text{C}$ , (n)  $\text{FeSAC-N}_{14}\text{C}$ , (o)  $\text{FeSAC-N}_{15}\text{C}$ , (p)  $\text{FeSAC-N}_{16}\text{C}$ , (q)  $\text{FeSAC-N}_{17}\text{C}$  and (r)  $\text{FeN}_4$ .

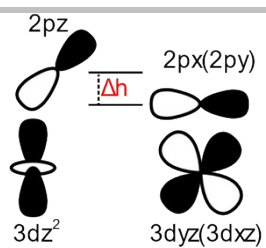

**Figure S21.** Schematic illustration of different hybridization modes of  $3d_{yz}$  ( $3d_{xz}$ ),  $3d_{z^2}$  and OH  $2\pi^*$  orbital. ( $\Delta h$  means the spatial height difference.)



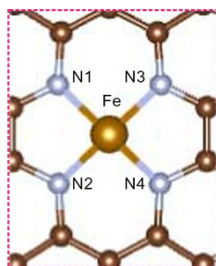

**Figure S22.** The schematic of each Fe-N bond length of  $\text{Fe}_{\text{SAC}}\text{-N}_x\text{C}(x=1-17)$ .

---

**Table S1.** Summary of NC, Fe<sub>SAC</sub>-NC, and FeN<sub>4</sub> BET data.

| Sample                | BET surface area (m <sup>2</sup> ·g <sup>-1</sup> ) | Total volume (cm <sup>3</sup> ·g <sup>-1</sup> ) | Mesopore size (nm) |
|-----------------------|-----------------------------------------------------|--------------------------------------------------|--------------------|
| NC                    | 255                                                 | 0.29                                             | 5.4                |
| Fe <sub>SAC</sub> -NC | 725                                                 | 1.66                                             | 15.4               |
| FeN <sub>4</sub>      | 752                                                 | 3.77                                             | 21.2               |

---

**Table S2.** Elemental composition of Fe<sub>SAC</sub>-NC.

| elemental analyzer |          |          |          | ICP      | TGA  |
|--------------------|----------|----------|----------|----------|------|
| C (wt.%)           | N (wt.%) | O (wt.%) | H (wt.%) | Fe(wt.%) |      |
| 81.38              | 8.97     | 3.21     | 0.96     | 5.48     | 5.39 |

**Table S3.** EXAFS fitting parameters of Fe foil and Fe<sub>SAC</sub>-NC.

| Samples               | Shell | N   | R (Å)     | $\Delta\sigma^2 \times 10^3$ (Å <sup>2</sup> ) | $\Delta E_0$ (eV) | R-factor |
|-----------------------|-------|-----|-----------|------------------------------------------------|-------------------|----------|
| Fe foil               | Fe-Fe | 8   | 2.42±0.01 | 6.8 ± 1.2                                      | 10.6 ± 0.8        | 0.037    |
|                       | Fe-Fe | 6   | 2.84±0.01 | 9.0 ± 2.1                                      | 10.1 ± 0.4        |          |
| FeN <sub>4</sub>      | Fe-N  | 4   | 1.89±0.01 | 3.1±1.6                                        | 1.2±0.1           | 0.019    |
| Fe <sub>SAC</sub> -NC | Fe-N  | 3.7 | 1.90±0.02 | 8.17± 1.1                                      | -7.8±0.5          | 0.042    |

---

**Table S4.** Summarize the  $E_0$  values of standard reference materials and Fe<sub>SAC</sub>-NC.

| Sample     | Fe foil  | Fe <sub>2</sub> O <sub>3</sub> | FeN <sub>4</sub> | Fe <sub>SAC</sub> -NC |
|------------|----------|--------------------------------|------------------|-----------------------|
| $E_0$ (eV) | 7112.216 | 7126.305                       | 7122.311         | 7123.292              |

**Table S5.** Summary of the Mossbauer parameters and assignments to different Iron species in Fe<sub>SAC</sub>-NC.

| Fe species | IS<br>(mm <sup>-1</sup> ) | QS<br>(mm <sup>-1</sup> ) | LW<br>(mm <sup>-1</sup> ) | Content (%) | Valence-state                        |
|------------|---------------------------|---------------------------|---------------------------|-------------|--------------------------------------|
| D1         | -0.06                     | 0.11                      | 0.58                      | 8.1         | $\alpha$ -Fe                         |
| D2         | 0.33                      | 1.38                      | 0.53                      | 30.2        | FeN <sub>4</sub> ,LS                 |
| D3         | -0.10                     | 0.86                      | 0.50                      | 61.7        | Fe <sup>III</sup> N <sub>4</sub> ,MS |

**Table S6.** Summarize the most near-term reported single atoms-based electrocatalysts.

| Sample                                    | Onset potential<br>(V vs. RHE) | Half-wave potential<br>(V vs. RHE) | Ref             |
|-------------------------------------------|--------------------------------|------------------------------------|-----------------|
| <b>Fe<sub>SAC</sub>-NC</b>                | <b>1.06</b>                    | <b>0.90</b>                        | <b>our work</b> |
| Ru-SAS/SNC                                | 0.998                          | 0.861                              | 4               |
| Cu/Zn-NC                                  | 0.98                           | 0.83                               | 2               |
| Co-N/C+NG                                 | 1.04                           | 0.915                              | 3               |
| Fe-N-CDC/CNT                              | 0.99                           | 0.86                               | 4               |
| Fe-NiNC-50                                | 1.0                            | 0.84                               | 5               |
| FeSA/HNPC                                 | 0.92                           | 0.83                               | 6               |
| Cu-S <sub>1</sub> N <sub>3</sub>          | 1.05                           | 0.918                              | 7               |
| Ni-N <sub>4</sub> /GHSs/Fe-N <sub>4</sub> | 0.93                           | 0.83                               | 8               |
| Co <sub>1</sub> -N <sub>3</sub> PS/HC     | 1.00                           | 0.91                               | 9               |
| PSTA-Co-1000                              | 0.96                           | 0.878                              | 10              |
| Fe-N/P-C-700                              | 0.941                          | 0.867                              | 11              |
| Fe/OES                                    | 1.00                           | 0.85                               | 12              |

**Table S7.** Fe-N1, Fe-N2, Fe-N3, Fe-N4 and the average Fe-N bond length over Fe-N-C catalysts.

| Catalysts                            | Fe-N1 (Å) | Fe-N2 (Å) | Fe-N3 (Å) | Fe-N4 (Å) | Average Fe-N (Å) |
|--------------------------------------|-----------|-----------|-----------|-----------|------------------|
| Fe <sub>SAC</sub> -N <sub>1</sub> C  | 1.90      | 1.90      | 1.90      | 1.90      | 1.90             |
| Fe <sub>SAC</sub> -N <sub>3</sub> C  | 1.91      | 1.90      | 1.91      | 1.89      | 1.90             |
| Fe <sub>SAC</sub> -N <sub>4</sub> C  | 1.90      | 1.90      | 1.89      | 1.91      | 1.90             |
| Fe <sub>SAC</sub> -N <sub>16</sub> C | 1.92      | 1.89      | 1.92      | 1.89      | 1.91             |



**Table S8.** Adsorption free energies of \*O, \*OH, and \*OOH on Fe<sub>SAC</sub>-N<sub>X</sub>C (X=1-17).

| Catalysts                            | $\Delta G_{*O}$ (eV) | $\Delta G_{*OH}$ (eV) | $\Delta G_{*OOH}$ (eV) |
|--------------------------------------|----------------------|-----------------------|------------------------|
| Fe <sub>SAC</sub> -N <sub>1</sub> C  | 1.93                 | 0.84                  | 3.56                   |
| Fe <sub>SAC</sub> -N <sub>2</sub> C  | 1.74                 | 0.86                  | 3.54                   |
| Fe <sub>SAC</sub> -N <sub>3</sub> C  | 1.70                 | 0.84                  | 3.60                   |
| Fe <sub>SAC</sub> -N <sub>4</sub> C  | 1.81                 | 0.86                  | 3.51                   |
| Fe <sub>SAC</sub> -N <sub>5</sub> C  | 1.70                 | 0.80                  | 3.52                   |
| Fe <sub>SAC</sub> -N <sub>6</sub> C  | 1.66                 | 0.86                  | 3.48                   |
| Fe <sub>SAC</sub> -N <sub>7</sub> C  | 1.65                 | 0.83                  | 3.48                   |
| Fe <sub>SAC</sub> -N <sub>8</sub> C  | 1.65                 | 0.85                  | 3.49                   |
| Fe <sub>SAC</sub> -N <sub>9</sub> C  | 1.66                 | 0.84                  | 3.53                   |
| Fe <sub>SAC</sub> -N <sub>10</sub> C | 1.66                 | 0.82                  | 3.53                   |
| Fe <sub>SAC</sub> -N <sub>11</sub> C | 1.66                 | 0.86                  | 3.61                   |
| Fe <sub>SAC</sub> -N <sub>12</sub> C | 1.75                 | 0.82                  | 3.49                   |
| Fe <sub>SAC</sub> -N <sub>13</sub> C | 1.65                 | 0.75                  | 3.40                   |
| Fe <sub>SAC</sub> -N <sub>14</sub> C | 1.65                 | 0.83                  | 3.49                   |
| Fe <sub>SAC</sub> -N <sub>15</sub> C | 1.77                 | 0.82                  | 3.51                   |
| Fe <sub>SAC</sub> -N <sub>16</sub> C | 1.76                 | 0.85                  | 3.53                   |
| Fe <sub>SAC</sub> -N <sub>17</sub> C | 1.66                 | 0.84                  | 3.50                   |
| FeN <sub>4</sub>                     | 1.39                 | 0.58                  | 3.56                   |

**Table S9.** Reaction free energy of elementary step for ORR at U = 0 V vs. RHE on Fe<sub>SAC</sub>-N<sub>X</sub>C(X=1-17).

| Catalysts                            | $\Delta G_1$ (eV) | $\Delta G_2$ (eV) | $\Delta G_3$ (eV) | $\Delta G_4$ (eV) | $\Delta G_5$ (eV) |
|--------------------------------------|-------------------|-------------------|-------------------|-------------------|-------------------|
| Fe <sub>SAC</sub> -N <sub>1</sub> C  | -0.51             | -0.85             | -1.63             | -1.09             | -0.84             |
| Fe <sub>SAC</sub> -N <sub>2</sub> C  | -0.52             | -0.86             | -1.80             | -0.87             | -0.86             |
| Fe <sub>SAC</sub> -N <sub>3</sub> C  | -0.55             | -0.76             | -1.90             | -0.86             | -0.84             |
| Fe <sub>SAC</sub> -N <sub>4</sub> C  | -0.55             | -0.86             | -1.82             | -0.90             | -0.80             |
| Fe <sub>SAC</sub> -N <sub>5</sub> C  | -0.52             | -0.89             | -1.70             | -0.95             | -0.86             |
| Fe <sub>SAC</sub> -N <sub>6</sub> C  | -0.70             | -0.74             | -1.82             | -0.80             | -0.86             |
| Fe <sub>SAC</sub> -N <sub>7</sub> C  | -0.50             | -0.94             | -1.83             | -0.82             | -0.83             |
| Fe <sub>SAC</sub> -N <sub>8</sub> C  | -0.42             | -1.01             | -1.84             | -0.80             | -0.85             |
| Fe <sub>SAC</sub> -N <sub>9</sub> C  | -0.46             | -0.93             | -1.87             | -0.82             | -0.84             |
| Fe <sub>SAC</sub> -N <sub>10</sub> C | -0.51             | -0.87             | -1.88             | -0.83             | -0.82             |
| Fe <sub>SAC</sub> -N <sub>11</sub> C | -0.71             | -0.72             | -1.85             | -0.89             | -0.86             |
| Fe <sub>SAC</sub> -N <sub>12</sub> C | -0.67             | -0.84             | -1.82             | -0.84             | -0.82             |
| Fe <sub>SAC</sub> -N <sub>13</sub> C | -0.54             | -0.98             | -1.75             | -0.90             | -0.75             |
| Fe <sub>SAC</sub> -N <sub>14</sub> C | -0.53             | -0.90             | -1.84             | -0.82             | -0.83             |
| Fe <sub>SAC</sub> -N <sub>15</sub> C | -0.53             | -0.88             | -1.74             | -0.95             | -0.82             |
| Fe <sub>SAC</sub> -N <sub>16</sub> C | -0.53             | -0.87             | -1.77             | -0.91             | -0.85             |
| Fe <sub>SAC</sub> -N <sub>17</sub> C | -0.53             | -0.89             | -1.84             | -0.82             | -0.84             |
| FeN <sub>4</sub>                     | -0.70             | -0.67             | -2.17             | -0.81             | -0.58             |

---

## References

1. J. K. Norskov, J. Rossmeisl, A. Logadottir, L. Lindqvist, J. R. Kitchin, T. Bligaard and H. Jonsson, *J. Phys. Chem. B*, 2004, **108**, 17886-17892.
2. M. Tong, F. Sun, Y. Xie, Y. Wang, Y. Yang, C. Tian, L. Wang and H. Fu, *Angew. Chem. Int. Ed.*, 2021, **60**, 14005-14012.
3. X. Zhang, X. Xu, S. Yao, C. Hao, C. Pan, X. Xiang, Z. Q. Tian, P. K. Shen, Z. Shao and S. P. Jiang, *Small*, 2022, **18**, e2105329.
4. J. Lilloja, E. Kibena-Poldsepp, A. Sarapuu, J. C. Douglin, M. Kaarik, J. Kozlova, P. Paiste, A. Kikas, J. Aruvali, J. Leis, V. Sammelselg, D. R. Dekel and K. Tammeveski, *ACS Catal.*, 2021, **11**, 1920-1931.
5. X. Zhu, D. Zhang, C.-J. Chen, Q. Zhang, R.-S. Liu, Z. Xia, L. Dai, R. Amal and X. Lu, *Nano Energy*, 2020, **71**, 104597.
6. X. Jin, Y. Xie, J. Fu, C. Zhao, Y. Xu, Y. Lv, B. Zhang, K. Sun, R. Si and J. Huang, *ChemCatChem*, 2021, **13**, 2683-2690.
7. H. Shang, X. Zhou, J. Dong, A. Li, X. Zhao, Q. Liu, Y. Lin, J. Pei, Z. Li, Z. Jiang, D. Zhou, L. Zheng, Y. Wang, J. Zhou, Z. Yang, R. Cao, R. Sarangi, T. Sun, X. Yang, X. Zheng, W. Yan, Z. Zhuang, J. Li, W. Chen, D. Wang, J. Zhang and Y. Li, *Nat. Commun.*, 2020, **11**, 3049-3059.
8. J. Chen, H. Li, C. Fan, Q. Meng, Y. Tang, X. Qiu, G. Fu and T. Ma, *Adv. Mater.*, 2020, **32**, e2003134.
9. Y. Chen, R. Gao, S. Ji, H. Li, K. Tang, P. Jiang, H. Hu, Z. Zhang, H. Hao, Q. Qu, X. Liang, W. Chen, J. Dong, D. Wang and Y. Li, *Angew. Chem. Int. Ed.*, 2021, **60**, 3212-3221.
10. X. Wei, D. Zheng, M. Zhao, H. Chen, X. Fan, B. Gao, L. Gu, Y. Guo, J. Qin, J. Wei, Y. Zhao and G. Zhang, *Angew. Chem. Int. Ed.*, 2020, **59**, 14639-14646.
11. K. Yuan, D. Luetzenkirchen-Hecht, L. Li, L. Shuai, Y. Li, R. Cao, M. Qiu, X. Zhuang, M. K. H. Leung, Y. Chen and U. Scherf, *J. Am. Chem. Soc.*, 2020, **142**, 2404-2412.
12. C.-C. Hou, L. Zou, L. Sun, K. Zhang, Z. Liu, Y. Li, C. Li, R. Zou, J. Yu and Q. Xu, *Angew. Chem. Int. Ed.*, 2020, **59**, 7384-7389.
